# Supplementary material
Source: PubMed Central journal article supplement (PMC8327320)

Supplementary Figure 1

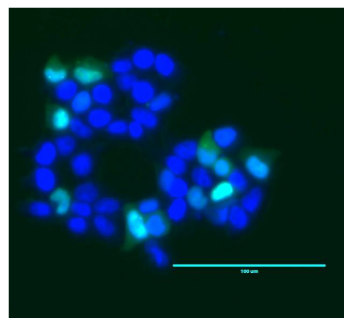

pEGFP-CIC-p.R353X

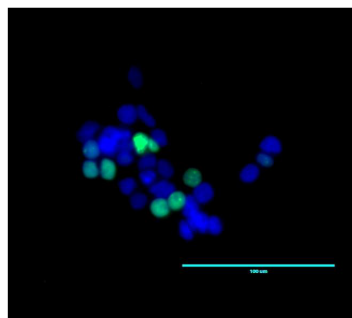

pEGFP-CIC-WT

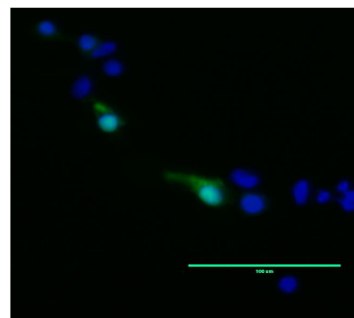

pEGFP-C1

Supplement: jmedgenet-2020-106987supp001.pdf [file jmedgenet-2020-106987supp001.pdf]
